# Supplementary material
Source: publisher figshare collection journal article supplement (https://acs.figshare.com/ndownloader/files/8917852)
Supplement: Supplementary file 1 [file 8917852]

## Supporting Information

# Significant Improvement on Enantioselectivity and Diastereoselectivity of Organocatalyzed Asymmetric Aldol Reaction Using Helical Polyisocyanides Bearing Proline Pendants

*Li Zhou, Ben-Fa Chu, Xin-Yu Xu, Lei Xu, Na Liu and Zong-Quan Wu\**

*Department of Polymer Science and Engineering, School of Chemistry and Chemical Engineering, Hefei University of Technology, and Anhui Key Laboratory of Advanced Catalytic Materials and Reaction Engineering, Hefei, Anhui Province 230009, China*

|                                                                                                                         |         |
|-------------------------------------------------------------------------------------------------------------------------|---------|
| <b>Measurements</b> .....                                                                                               | S3      |
| <b>Materials</b> .....                                                                                                  | S3      |
| Synthesis of monomer <b>1</b> and <b>1-A</b> .....                                                                      | S4-S6   |
| Synthesis of poly- <b>1<sub>m</sub></b> and poly- <b>1<sub>m</sub>-A</b> .....                                          | S6-S8   |
| Procedure for aldol reaction .....                                                                                      | S8      |
| Characterization data for Aldol reaction products .....                                                                 | S8-S11  |
| References .....                                                                                                        | S11-S12 |
| <b>Table S1.</b> Optimization on Aldol reaction .....                                                                   | S13     |
| <b>Table S2.</b> Results of Aldol reaction using recycled poly- <b>1<sub>150</sub>-A</b> .....                          | S14     |
| <b>Figure S1.</b> Plot of ellipticity and optical rotation values of poly- <b>1<sub>ms</sub></b> with $M_n$ .....       | S15     |
| <b>Figure S2.</b> SEC of poly- <b>1<sub>m</sub>-As</b> with different $M_n$ s .....                                     | S15     |
| <b>Figure S3-S4.</b> $^1\text{H}$ NMR spectra for poly- <b>1<sub>150</sub></b> and poly- <b>1<sub>150</sub>-A</b> ..... | S16     |
| <b>Figure S5.</b> Plots of ellipticity and optical rotation of poly- <b>1<sub>m</sub>-As</b> with $M_n$ .....           | S17     |
| <b>Figure S6-S7.</b> $^1\text{H}$ NMR spectra for <b>3</b> and <b>4</b> .....                                           | S17-S18 |
| <b>Figure S8-S10.</b> $^1\text{H}$ NMR, $^{13}\text{C}$ NMR and FT-IR spectra of <b>1</b> .....                         | S18-S19 |
| <b>Figure S11-S13.</b> $^1\text{H}$ NMR, $^{13}\text{C}$ NMR and FT-IR spectra for <b>1-A</b> .....                     | S20-S21 |
| <b>Figure S14-S19.</b> $^1\text{H}$ NMR spectra for Aldol reaction products .....                                       | S21-S24 |
| <b>Figure S21-S32.</b> HPLC curves for Aldol reaction products .....                                                    | S24-S30 |

**Measurements.**

The  $^1\text{H}$  and  $^{13}\text{C}$  NMR spectra were recorded using a Bruker 600 MHz spectrometer  $\{\text{H}\}$ . Size exclusion chromatography (SEC) was performed on Waters 1515 pump and Waters 2414 differential refractive index (RI) detector (set at 40 °C) using a series of two linear TSK gel GMH<sub>HR</sub>-H columns. Molecular weight ( $M_n$ ) and its polydispersity ( $M_w/M_n$ ) data are reported relative to polystyrene standards. The eluent was tetrahydrofuran (THF) at a flow rate of 0.8 mL/min. FT-IR spectra were recorded on Perkin-Elmer Spectrum BX FT-IR system using KBr pellets. Circular dichroism (CD) spectra were obtained in a 1.0 cm quartz cell using a JASCO J1500 spectropolarimeter. The polymer concentration was calculated on the basis of the monomer units and was 0.2 mg/mL. The UV-vis absorption spectra were recorded on a UNICO 4802 UV/vis double beam spectrophotometer. The optical rotations were measured in  $\text{CHCl}_3$ , THF and  $\text{CH}_3\text{OH}$  with vol. 1% of TFA at room temperature using a 10.0 cm quartz cell on a WZZ-2B polarimeter. Analytical high performance liquid chromatography (HPLC) was carried out on UltiMate 3000 and SHIMADZU LC-20AT equipment using chiral columns.

**Materials.**

All solvents were obtained from Sinopharm. Co. Ltd., and were purified by the standard procedures before use. All chemicals were purchased from Aladdin, Sinopharm, and Sigma-Aldrich Chemical Co. Ltd., and were used as received without further purification otherwise denoted. Methoxy phenylethynyl Pd(II) complex was prepared according to the procedures reported by our group previously, and the structure was confirmed by  $^1\text{H}$  NMR spectra.<sup>1</sup>

**Scheme S1.** Synthesis of monomer **1** and **1-A**

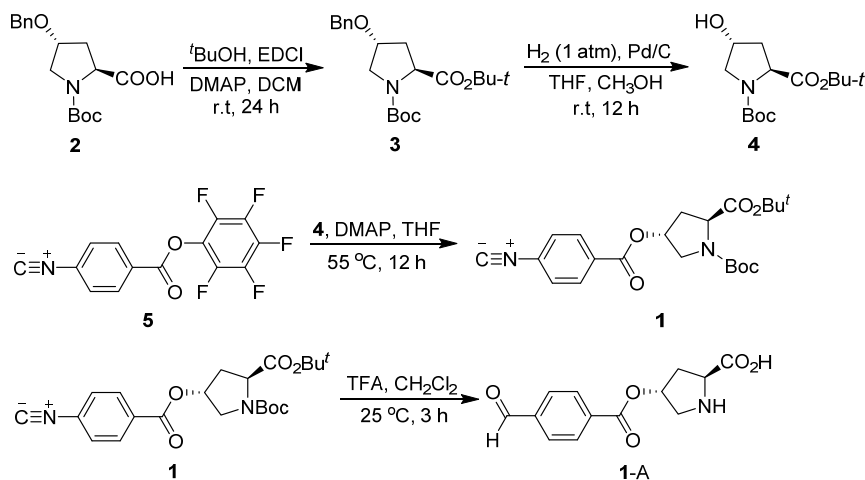

Compound **3**. This compound was prepared according to the reported literature with slight modification.<sup>2</sup> Boc-Hyp(Bzl)-OH (**2**, 12.53 g, 38.98 mmol) was dissolved in dry CH<sub>2</sub>Cl<sub>2</sub> (80 mL) at 0 °C. 1-(3-Dimethylaminopropyl)-3-ethylcarbodiimide hydrochloride (EDCI, 8.23 g, 42.87 mmol), 4-dimethylaminopyridine (DMAP, 2.38 g, 19.49 mmol) and *tert*-butanol (11.55 g, 155.90 mmol) were added to this solution at 0 °C. After 2 h, the solution was warmed up to room temperature and stirred overnight. Then, the solvent was evaporated under reduced pressure. The residue was re-dissolved in ethyl acetate (EtOAc, 25 mL) and washed with water (50 mL × 2) and an aqueous solution of sodium bicarbonate (NaHCO<sub>3</sub>, 50 mL × 2). The organic layer was dried over magnesium sulfate (MgSO<sub>4</sub>) and purified by flash column chromatography using petroleum ether and EtOAc as eluent (v/v = 1/1) to afford **3** as a colorless oil (12.75 g, 87% yield). <sup>1</sup>H NMR (600 MHz, CDCl<sub>3</sub>): δ 7.28–7.35 (m, 5H, ArH), 4.47–4.54 (m, 2H, CH<sub>2</sub>), 4.23–4.30 (m, 1H, CH), 4.14–4.18 (m, 1H, CH), 3.51–3.69 (m, 2H, CH<sub>2</sub>), 2.02–2.39 (m, 2H, CH<sub>2</sub>), 1.44 (s, 9H, (CH<sub>3</sub>)<sub>3</sub>), 1.45 (s, 9H, CH<sub>3</sub>).

Compound **4**. This compound was prepared followed the reported literature with slight modification.<sup>2</sup> 10% Pd/C (1.28 g) was first heated to 140 °C under vacuum overnight. Then, a degassed solution of **3** (12.75 g, 33.78 mmol) in THF (20 mL) and methanol (40 mL) was added to the activated Pd/C. The mixed solution was stirred at room temperature under an atmosphere of hydrogen for 12 h. The Pd/C was removed from the solution *via* filtration through celite. The filtrate was concentrated and the crude product was purified by flash column chromatography using petroleum ether and EtOAc as eluent (v/v = 3/1) to afford **4** as a colorless oil (7.75 g, 82% yield). <sup>1</sup>H NMR (600 MHz, CDCl<sub>3</sub>):  $\delta$  4.45–4.47 (t, 2H, CH), 4.10–4.32 (m, 1H, CH), 3.40–3.62 (m, 2H, CH<sub>2</sub>), 2.02–2.30 (m, 2H, CH<sub>2</sub>), 2.04 (s, 1H, OH), 1.46 (s, 9H, CH<sub>3</sub>), 1.43 (s, 9H, CH<sub>3</sub>).

Monomer **1**. Compound **5** was first prepared followed the procedure reported by our group previously and the structure was confirmed by <sup>1</sup>H NMR.<sup>3</sup> A mixed solution of **4** (2.31 g, 8.03 mmol), **5** (3.76 g, 12.01 mmol), DMAP (0.49 g, 4.01 mmol) in dry THF (20 mL) was stirred at 55 °C for 12 h under nitrogen. The solvent was removed by evaporation under reduced pressure, the residue was purified by silica gel chromatography using petroleum ether and EtOAc as eluent (v/v = 8/1) to afford **1** as a white solid (2.93 g, 88% yield).<sup>4</sup> m.p.: 216–218 °C;  $[\alpha]_D^{20} = -57.0$  ( $c = 0.33$ , CHCl<sub>3</sub>), <sup>1</sup>H NMR (600 MHz, CDCl<sub>3</sub>, 25 °C):  $\delta$  8.04–8.05 (m, 2H, ArH), 7.45–7.46 (m, 2H, ArH), 5.49–5.51 (t, 1H, CH), 4.30–4.38 (m, 1H, CH), 3.64–3.85 (m, 2H, CH<sub>2</sub>), 2.29–2.56 (m, 2H, CH<sub>2</sub>), 1.49 (s, 9H, CH<sub>3</sub>), 1.46 (s, 9H, CH<sub>3</sub>). <sup>13</sup>C NMR (150 MHz, CDCl<sub>3</sub>):  $\delta$  174.10, 170.07, 167.00, 156.50, 133.59, 133.16, 129.16, 84.24, 83.17, 75.92, 61.10, 54.61, 39.35, 38.24, 30.96, 30.66. FT-IR (KBr,

$\text{cm}^{-1}$ ): 2984 ( $\nu_{\text{C-H}}$ ), 2937 ( $\nu_{\text{C-H}}$ ), 2128 ( $\nu_{\text{C}\equiv\text{N}}$ ), 1746 ( $\nu_{\text{C=O}}$ ), 1715 ( $\nu_{\text{C=O}}$ ). MS  $m/z$  calcd for  $\text{C}_{22}\text{H}_{28}\text{N}_2\text{O}_6$   $[\text{M}]^+$ : 416.1947; Found: 416.1976. Anal. Calcd (%) for  $\text{C}_{22}\text{H}_{28}\text{N}_2\text{O}_6$ : C, 63.45; H, 6.78; N, 6.73. Found (%): C, 63.42; H, 6.79; N, 6.75.

Compound **1-A**. Monomer **1** (1.09 g, 2.62 mmol) was dissolved in dry  $\text{CH}_2\text{Cl}_2$  (10 mL), trifluoroacetic acid (TFA, 1 mL) was slowly added to the stirring solution under an ice bath. The resulting solution was stirred for 3 h at room temperature. After the solvent was removed by evaporation under reduced pressure, the afforded residues was dissolved in 1 mL water and pH was adjusted to 6.4 by added ammonium hydroxide. After concentrated to dryness, the residue was purified by silica gel chromatography using  $\text{CH}_2\text{Cl}_2$  and  $\text{CH}_3\text{OH}$  as eluent ( $v/v = 1/1$ ) to afford **1-A** as a white solid (0.61 g, 83% yield).<sup>2</sup> m.p.: 68–69 °C;  $[\alpha]_{\text{D}}^{20} = -59.5$  ( $c = 0.33$ ,  $\text{CH}_3\text{OH}$ ),  $^1\text{H}$  NMR (600 MHz,  $\text{CD}_3\text{OD}$ , 25 °C):  $\delta$  8.95 (s, 0.23H, CHO), 8.36 (s, 0.77H, CHO), 8.06 (d,  $J = 8.4$  Hz, 2H, ArH), 7.74 (d,  $J = 8.4$  Hz, 2H, ArH), 7.32 (d,  $J = 6.0$  Hz, 1H, NH), 5.63–5.64 (t, 1H, CH), 4.26–4.29 (m, 1H, CH), 3.54–3.74 (m, 2H,  $\text{CH}_2$ ), 2.37–2.70 (m, 2H,  $\text{CH}_2$ ).  $^{13}\text{C}$  NMR (150 MHz,  $\text{CD}_3\text{OD}$ ):  $\delta$  167.82, 163.08, 145.08, 133.19, 127.51, 121.47, 119.31, 63.11, 56.02, 53.61, 38.48. FT-IR (KBr,  $\text{cm}^{-1}$ ): 3480 ( $\nu_{\text{N-H}}$ ), 3001 ( $\nu_{\text{C-H}}$ ), 2995 ( $\nu_{\text{C-H}}$ ), 1714 ( $\nu_{\text{C=O}}$ ), 1676 ( $\nu_{\text{C=O}}$ ), 1600 ( $\nu_{\text{C}\equiv\text{N}}$ ). MS  $m/z$  calcd for  $\text{C}_{13}\text{H}_{15}\text{N}_2\text{O}_5$   $[\text{M} + \text{H}]^+$ : 279.0981; Found: 279.1019. Anal. Calcd (%) for  $\text{C}_{13}\text{H}_{14}\text{N}_2\text{O}_5$ : C, 56.10; H, 5.08; N, 10.06. Found: C, 56.15%; H, 5.09%; N, 10.04%.

*Typical polymerization procedure for poly-1<sub>ms</sub>*: Typical procedure for the polymerization of poly-**1**<sub>150</sub> is given below as an example. A 10 mL oven-dried flask was charged with monomer **1** (0.20 g, 0.48 mmol), the methoxy phenylethynyl Pd(II) catalyst (1.63 mg, 3.20

$\times 10^{-3}$  mmol), dry PhCl (2.40 mL) and a stir bar. The concentrations of monomer **1** and the Pd(II) complex were 0.2 and 0.0013 M, respectively ( $[\mathbf{1}]_0/[\text{Pd}]_0 = 150$ ). The reaction flask was then immersed into an oil bath at 80 °C and stirred for 5 h. After cooled to room temperature, the polymerization solution was precipitated into a large amount of *n*-hexane, collected by centrifugation, and dried in vacuum at room temperature overnight to afford poly-**1**<sub>150</sub> as a yellow solid (0.17 mg, 85% yield). SEC:  $M_n = 24.1$  kDa,  $M_w/M_n = 1.07$ . <sup>1</sup>H NMR (600 MHz, CDCl<sub>3</sub>, 25 °C):  $\delta$  7.33–7.60 (br, 2H, ArH), 5.65 (br, 2H, ArH), 4.96 (br, 1H, CH), 4.18 (br, 1H, CH), 3.51 (br, 2H, CH<sub>2</sub>), 1.42–1.46 (br, 18H, CH<sub>3</sub>). FT-IR (KBr, cm<sup>-1</sup>): 2978 ( $\nu_{\text{C-H}}$ ), 2932 ( $\nu_{\text{C-H}}$ ), 2885 ( $\nu_{\text{C-H}}$ ), 1704 ( $\nu_{\text{C=O}}$ ), 1600 ( $\nu_{\text{C=N}}$ ).

*Typical procedure for poly-1<sub>ms</sub>-A:* Typical experimental procedures for the preparation of poly-**1**<sub>150</sub>-A is given below as an example. Poly-**1**<sub>150</sub> (0.17 g) was dissolved in dry CH<sub>2</sub>Cl<sub>2</sub> (5 mL), TFA (0.5 mL) was slowly added to the stirred solution under an ice bath. The resulting solution was stirred for 10 h at room temperature. Excess acid was removed from the reaction by a flow of N<sub>2</sub> gas at the end of the reaction. The resulting residues were dissolved in a DMF/water (2 mL, v/v = 1/1) and dialyzed exhaustively against nanopure water (18.2  $\Omega$ ) (MWCO = 3.5 kDa) and lyophilized to give deprotected poly-**1**<sub>150</sub>-A, or alternatively dissolved in DMF and precipitated out of solution via the addition of water. The precipitate was then filtered, washed with water and dried in the vacuum at 40 °C overnight (0.085 g, 80% yield).<sup>2</sup> SEC:  $M_n = 16.1$  kDa,  $M_w/M_n = 1.19$ . <sup>1</sup>H NMR (600 MHz, DMSO-*d*<sup>6</sup>, 25 °C):  $\delta$  7.22–7.56 (br, 2H, ArH), 5.72 (br, 2H, ArH), 4.09–5.11 (br, 6H, CH, CH<sub>2</sub>). FT-IR (KBr, cm<sup>-1</sup>): 3431 ( $\nu_{\text{N-H}}$ ), 2925 ( $\nu_{\text{C-H}}$ ), 2853 ( $\nu_{\text{C-H}}$ ), 1716 ( $\nu_{\text{C=O}}$ ), 1676 ( $\nu_{\text{C=O}}$ ),

1600 ( $\nu_{\text{C=N}}$ ).

*General procedure for Aldol reaction:* Polymer catalyst with 20% (with respect to repeating units) loading was added to expected solvent, cyclohexanone (4.0 eq) was added to the stirring solution. After 1 h, aromatic aldehyde (1.0 eq) was added, and the resulting solution was stirred for the time indicated in Table S1 and Table 2, 3 in the main text at a specific temperature. Then, *n*-hexane was added, and the mixture was centrifuged. The solution was concentrated under reduced pressure and the crude product was purified by preparative thin layer chromatography (TLC) on silica gel using petroleum ether and EtOAc as eluent to afford the product. Characterization data for Aldol reaction products are shown below.

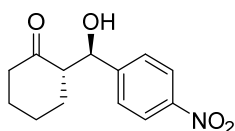

(2S,1'R)-2-(Hydroxyl-(*p*-nitrophenyl)methyl)cyclohexan-1-one:<sup>5</sup>  $^1\text{H}$  NMR (600 MHz,  $\text{CDCl}_3$ , 25 °C):  $\delta$  8.22 (d, 2H,  $J$  = 6.0 Hz, ArH), 7.51 (d, 2H,  $J$  = 6.0 Hz, ArH), 5.49 (s, 0.14H, *syn* CH), 4.89–4.91 (dd,  $J_1$  = 6.0 Hz,  $J_2$  = 3.0 Hz, 0.85H, *anti* CH), 4.07 (d, 1H,  $J$  = 3.0, OH), 1.37–2.43 (m, 9H,  $-\text{CHCH}_2\text{CH}_2\text{CH}_2\text{CH}_2-$ ). Enantiomeric excess (*ee*): 81%, diastereomeric ratio (*dr*): 86/14, determined by HPLC analysis, Chiralpak AD-H; *n*-hexane/*i*-PrOH = 85/15 (v/v); 0.5 mL min<sup>-1</sup>; 254 nm; 25 °C;  $t_{\text{R}1}$  (*syn.*) = 25.01 min,  $t_{\text{R}2}$  (*syn.*) = 27.32 min,  $t_{\text{R}1}$  (*anti.*) = 30.34 min,  $t_{\text{R}2}$  (*anti.*) = 39.60 min.



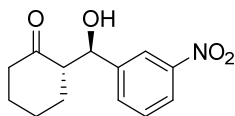

(2S, 1'R)-2-(Hydroxyl-(*m*-nitrophenyl)methyl)cyclohexan-1-one:<sup>5</sup> <sup>1</sup>H NMR (600 MHz, CDCl<sub>3</sub>, 25 °C):  $\delta$  8.12–8.21 (m, 2H, ArH), 7.66–7.68 (m, 1H, ArH), 7.51–7.54 (m, 1H, ArH), 5.35 (s, 0.16H, *syn* CH), 4.89–4.90 (dd,  $J_1 = 3.0$  Hz,  $J_2 = 3.0$  Hz, 0.82H, *anti* CH), 4.12 (d, 1H,  $J = 3.0$  Hz, OH), 1.28–2.64 (m, 9H, -CHCH<sub>2</sub>CH<sub>2</sub>CH<sub>2</sub>CH<sub>2</sub>-). *ee*: 82%, *dr*: 75/25, determined by HPLC analysis, Chiralpak IA; *n*-hexane/*i*-PrOH = 90/10 (v/v); 0.5 mL min<sup>-1</sup>, 230 nm; 25 °C;  $t_{R1}$  (*syn.*) = 28.69 min,  $t_{R2}$  (*syn.*) = 33.37 min,  $t_{R1}$  (*anti.*) = 36.57 min,  $t_{R2}$  (*anti.*) = 45.09 min.

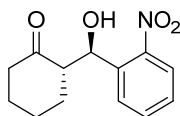

(2S, 1'R)-2-(Hydroxyl-(*o*-nitrophenyl)methyl)cyclohexan-1-one:<sup>5</sup> <sup>1</sup>H NMR (600 MHz, CDCl<sub>3</sub>, 25 °C):  $\delta$  7.86 (d,  $J = 6.0$  Hz, 1H, ArH), 7.78 (d,  $J = 6.0$  Hz, 1H, ArH), 7.63–7.65 (t, 1H, ArH), 7.42–7.45 (t, 1H, ArH), 5.45 (d,  $J = 6.0$  Hz, 1H, CH), 4.19 (s, 1H, OH), 1.26–2.78 (m, 9H, -CHCH<sub>2</sub>CH<sub>2</sub>CH<sub>2</sub>CH<sub>2</sub>-). *ee*: 90%, *dr*: >20/1, determined by HPLC analysis, Chiralpak AD-H; *n*-hexane/*i*-PrOH = 90/10 (v/v); 0.5 mL min<sup>-1</sup>; 254 nm; 25 °C;  $t_{R1}$  (*syn.*) = 18.60 min,  $t_{R1}$  (*anti.*) = 37.38 min,  $t_{R2}$  (*anti.*) = 40.29 min.

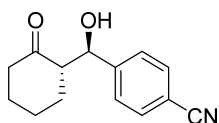

(2S, 1'R)-2-(Hydroxyl-(*p*-cyanophenyl)methyl)cyclohexan-1-one:<sup>5</sup> <sup>1</sup>H NMR (600 MHz,

CDCl<sub>3</sub>, 25 °C):  $\delta$  7.41 (d,  $J$  = 6.0 Hz, 1H, ArH), 7.37 (d,  $J$  = 12.0 Hz, 1H, ArH), 7.08 (d,  $J$  = 12.0 Hz, 1H, ArH), 6.98 (d,  $J$  = 12.0 Hz, 1H, ArH), 5.61–5.63 (t, 0.23H, *syn* CH), 5.33 (d,  $J$  = 6.0 Hz, 0.76H, *anti* CH), 4.46 (d,  $J$  = 6.0 Hz, 1H, OH), 1.28–3.40 (m, 9H, -CHCH<sub>2</sub>CH<sub>2</sub>CH<sub>2</sub>CH<sub>2</sub>-). *ee*: 77%, *dr*: 77/23, determined by HPLC analysis, Chiralpak AD-H; *n*-hexane/*i*-PrOH = 85/15 (v/v); 0.5 mL min<sup>-1</sup>; 230 nm; 25 °C;  $t_{R1}$  (*syn.*) = 20.66 min,  $t_{R2}$  (*syn.*) = 26.21 min,  $t_{R1}$  (*anti.*) = 23.29 min,  $t_{R2}$  (*anti.*) = 32.23 min.

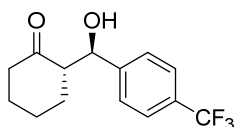

(2S, 1'R)-2-(Hydroxyl-(*p*-trifluoromethylphenyl)methyl)cyclohexan-1-one:<sup>6</sup> <sup>1</sup>H NMR (600 MHz, CDCl<sub>3</sub>, 25 °C): 7.59–7.61 (m, 2H, ArH), 7.42–7.45 (m, 2H, ArH), 5.44 (s, 0.22H, *syn* CH), 4.83–4.85 (dd,  $J_1$  = 3.0 Hz,  $J_2$  = 6.0 Hz, 0.72H, *trans* CH), 4.03 (d, 2H,  $J$  = 3.0 Hz, OH), 1.25–3.10 (m, 9H, -CH<sub>2</sub>CH<sub>2</sub>CH<sub>2</sub>CH<sub>2</sub>-). *ee*: 87%, *dr*: 88/12, determined by HPLC analysis, Chiralpak AD-H; *n*-hexane/*i*-PrOH = 95/5 (v/v); 0.8 mL min<sup>-1</sup>; 210 nm; 25 °C;  $t_{R1}$  (*syn.*) = 11.44 min,  $t_{R2}$  (*syn.*) = 13.75 min,  $t_{R1}$  (*anti.*) = 19.43 min,  $t_{R2}$  (*anti.*) = 24.39 min.

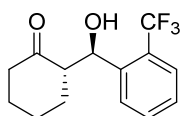

(2S, 1'R)-2-(Hydroxyl-(*o*-trifluoromethyl)methyl)cyclohexan-1-one:<sup>7</sup> <sup>1</sup>H NMR (600 MHz, CDCl<sub>3</sub>, 25 °C): 7.71 (d,  $J$  = 6.0 Hz, 1H, ArH), 7.59–7.65 (m, 2H, ArH), 7.39–7.42

(t, 1H, ArH), 5.30 (d,  $J = 12.0$  Hz, 1H), 4.00 (s, 1H), 1.25–2.76 (m, 9H,  $-\text{CH}_2\text{CH}_2\text{CH}_2\text{CH}_2-$ ).  
 $ee$ : 95%,  $dr$ : >20/1, determined by HPLC analysis, Chiralpak AD-H;  $n$ -hexane/ $i$ -PrOH = 90/10 (v/v); 0.5 mL min<sup>-1</sup>; 254 nm; 25 °C;  $t_{R1}$  (*anti*.) = 24.55 min,  $t_{R2}$  (*anti*.) = 25.92 min.

## References

- (1) Xue, Y.-X.; Zhu, Y.-Y.; Gao, L.-M.; He, X.-Y.; Liu, N.; Zhang, W.-Y.; Yin, J.; Ding, Y.-S.; Zhou, H.-P.; Wu, Z.-Q. Air-Stable (Phenylbuta-1,3-diynyl)palladium(II) Complexes: Highly Active Initiators for Living Polymerization of Isocyanides. *J. Am. Chem. Soc.* **2014**, *136*, 4706–4713.
- (2) Annhelen, L.; Thomas, P. S.; Thomas, H. E.; Deborah, A. L.; Rachel, K. O. L-Proline Functionalized Polymers Prepared by RAFT Polymerization and Their Assemblies as Supported Organocatalysts. *Macromolecules* **2011**, *44*, 7233–7241.
- (3) Su, M.; Liu, N.; Wang, Q.; Wang, H.-Q.; Yin, J.; Wu, Z.-Q. Facile Synthesis of Poly(phenyleneethynylene)-*block*-Polyisocyanide Copolymers via Two Mechanistically Distinct, Sequential Living Polymerizations Using a Single Catalyst. *Macromolecules* **2016**, *49*, 110–119.
- (4) Yin, J.; Xu, L.; Han, X.; Zhou, L.; Li, C.-L.; Wu, Z.-Q. A Facile Synthetic Route to Helical Poly(phenyl isocyanide)s with Defined Pendants and Controlled Helicity. *Polym. Chem.* **2017**, *8*, 545–556.
- (5) Zhao, Q.-Q.; Lam, Y.-H.; Kheirabadi, M.; Xu, C.-S.; Houk, K. N.; Schafmeister, C. E. Hydrophobic Substituent Effects on Proline Catalysis of Aldol Reactions in

Water. *J. Org. Chem.* **2012**, *77*, 4784–4792.

- (6) Serra–Pont, A.; Alfonso, I.; Jimeno, C.; Solà, J. Dynamic assembly of a zinc-templated bifunctional organocatalyst in the presence of water for the asymmetric aldol reaction.

*Chem. Commun.* **2015**, *51*, 17386–17389.

- (7) Obregon–Zúniga, A.; Milan, M.; Juaristi, E. Improving the Catalytic Performance of (S)-Proline as Organocatalyst in Asymmetric Aldol Reactions in the Presence of Solvate Ionic Liquids: Involvement of a Supramolecular Aggregate. *Org. Lett.* **2017**, *19*, 1108–1111.

**Table S1.** Optimization of the reaction conditions for Aldol reaction of 4-nitrobenzaldehyde with cyclohexanone catalyzed by **1-A** and poly-**1<sub>m</sub>-A**.<sup>a</sup>

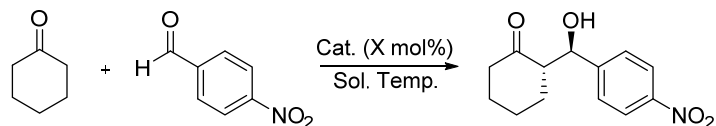

| Run | Solvent                         | Temp. | Cat.                           | X  | <i>t</i> (h) | Yield <sup>b</sup> | anti./syn <sup>c</sup> | <i>ee</i> <sup>c</sup> |
|-----|---------------------------------|-------|--------------------------------|----|--------------|--------------------|------------------------|------------------------|
| 1   | THF                             | r.t.  | <b>1-A</b>                     | 20 | 10           | 85                 | 75/25                  | 17                     |
| 2   | DMF                             | r.t.  | <b>1-A</b>                     | 20 | 10           | 86                 | 85/15                  | 14                     |
| 3   | CH <sub>2</sub> Cl <sub>2</sub> | r.t.  | poly- <b>1<sub>50</sub>-A</b>  | 20 | 12           | 80                 | 83/17                  | 57                     |
| 4   | CH <sub>2</sub> Cl <sub>2</sub> | r.t.  | poly- <b>1<sub>75</sub>-A</b>  | 20 | 12           | 79                 | 83/17                  | 66                     |
| 5   | CH <sub>2</sub> Cl <sub>2</sub> | r.t.  | poly- <b>1<sub>100</sub>-A</b> | 20 | 12           | 81                 | 85/15                  | 71                     |
| 6   | CH <sub>2</sub> Cl <sub>2</sub> | r.t.  | poly- <b>1<sub>150</sub>-A</b> | 20 | 12           | 80                 | 84/16                  | 72                     |
| 7   | CH <sub>2</sub> Cl <sub>2</sub> | r.t.  | poly- <b>1<sub>200</sub>-A</b> | 20 | 12           | 81                 | 82/18                  | 71                     |
| 8   | CH <sub>2</sub> Cl <sub>2</sub> | r.t.  | poly- <b>1<sub>150</sub>-A</b> | 30 | 12           | 83                 | 85/15                  | 72                     |
| 9   | CH <sub>3</sub> OBu- <i>t</i>   | r.t.  | poly- <b>1<sub>150</sub>-A</b> | 20 | 12           | 67                 | 60/40                  | 71                     |
| 10  | PhCl                            | r.t.  | poly- <b>1<sub>150</sub>-A</b> | 20 | 12           | 70                 | 75/25                  | 61                     |
| 11  | EtOAc                           | r.t.  | poly- <b>1<sub>150</sub>-A</b> | 20 | 12           | 73                 | 72/28                  | 62                     |
| 12  | glycol                          | r.t.  | poly- <b>1<sub>150</sub>-A</b> | 20 | 48           | n.d. <sup>d</sup>  | --                     | --                     |
| 13  | cyclohexanone                   | r.t.  | poly- <b>1<sub>150</sub>-A</b> | 20 | 12           | 83                 | 63/37                  | 57                     |

<sup>a</sup>Unless otherwise specified, all reactions were carried out with 4-nitrobenzaldehyde (0.2 mmol), cyclohexanone (0.8 mmol) in specific solvent (1.0 mL). <sup>b</sup>Yield of isolated products. <sup>c</sup>*ee* values are referred to the major isomer determined by HPLC analysis using a chiral stationary phase. <sup>d</sup>Not detected.

**Table S2.** Yield and *ee* values of the reaction for 2-trifluoromethylbenzaldehyde and cyclohexanone catalyzed by recycled poly-**1**<sub>150</sub>-A<sup>a</sup>

| Cycle          | Yield <sup>b</sup> (%) | anti./syn. <sup>c</sup> | <i>ee</i> (%) <sup>c</sup> | Recovery (%) |
|----------------|------------------------|-------------------------|----------------------------|--------------|
| 1              | 65                     | >20/1                   | 95                         | 92           |
| 2              | 63                     | >20/1                   | 94                         | 91           |
| 3              | 63                     | >20/1                   | 94                         | 90           |
| 4 <sup>d</sup> | 58                     | >20/1                   | 92                         | 88           |

<sup>a</sup>Unless otherwise denoted, all reactions were carried out with 2-trifluoromethylbenzaldehyde (0.2 mmol), cyclohexanone (0.8 mmol) in CH<sub>2</sub>Cl<sub>2</sub> (1.0 mL).

<sup>b</sup>Yield of isolated products. <sup>c</sup>The *ee* values are referred to the major isomer determined by HPLC analysis using a chiral stationary phase. <sup>d</sup>The reaction time of the forth recycle was 48 h.

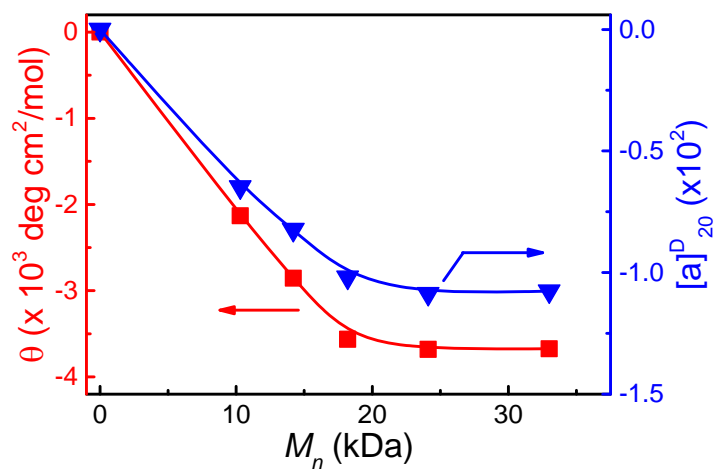

**Figure S1.** Plot of ellipticity and optical rotation values of poly-**1**<sub>ms</sub> with the  $M_n$ .

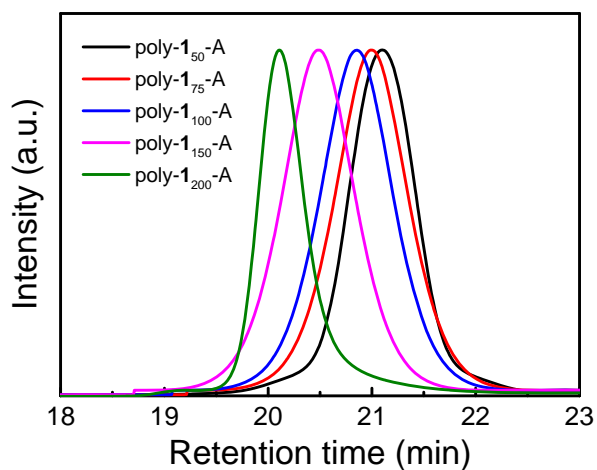

**Figure S2.** Size exclusion chromatograms of poly-**1**<sub>50</sub>-A, poly-**1**<sub>75</sub>-A, poly-**1**<sub>100</sub>-A, poly-**1**<sub>150</sub>-A, and poly-**1**<sub>200</sub>-A. SEC condition: eluent = THF, temperature = 40 °C.

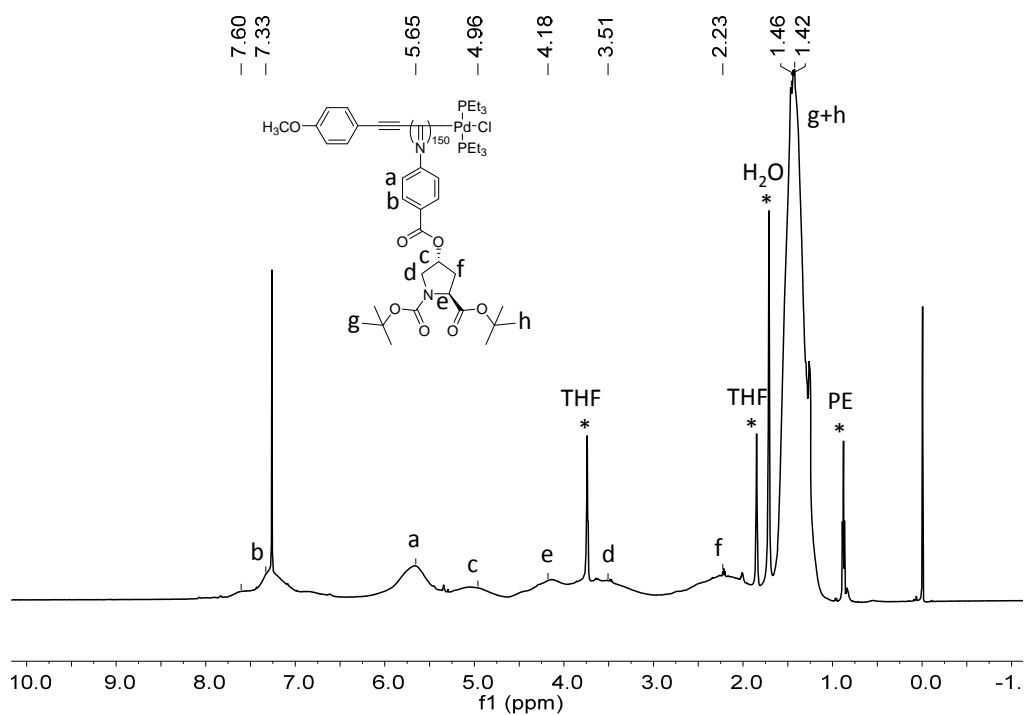

**Figure S3.** <sup>1</sup>H NMR (600 MHz) spectrum of poly-1<sub>150</sub> measured in CDCl<sub>3</sub> at 25 °C.

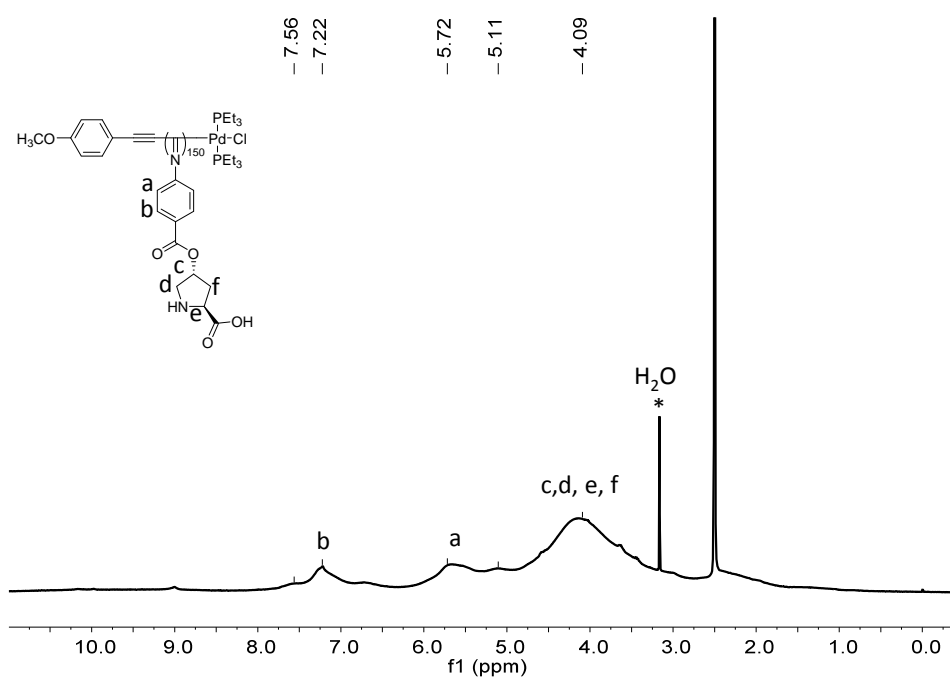

**Figure S4.** <sup>1</sup>H NMR (600 MHz) spectrum of poly-1<sub>150</sub>-A measured in DMSO-*d*<sub>6</sub> at 25 °C.



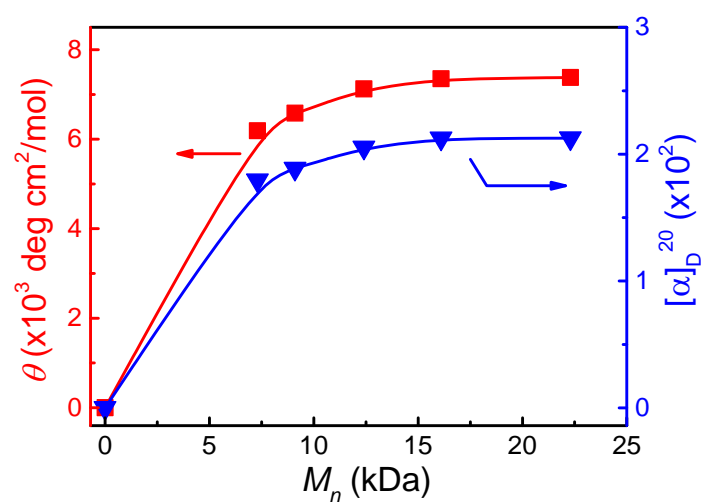

**Figure S5.** Plot of ellipticity and optical rotation values of poly-**1**<sub>m</sub>-As with the  $M_n$ .

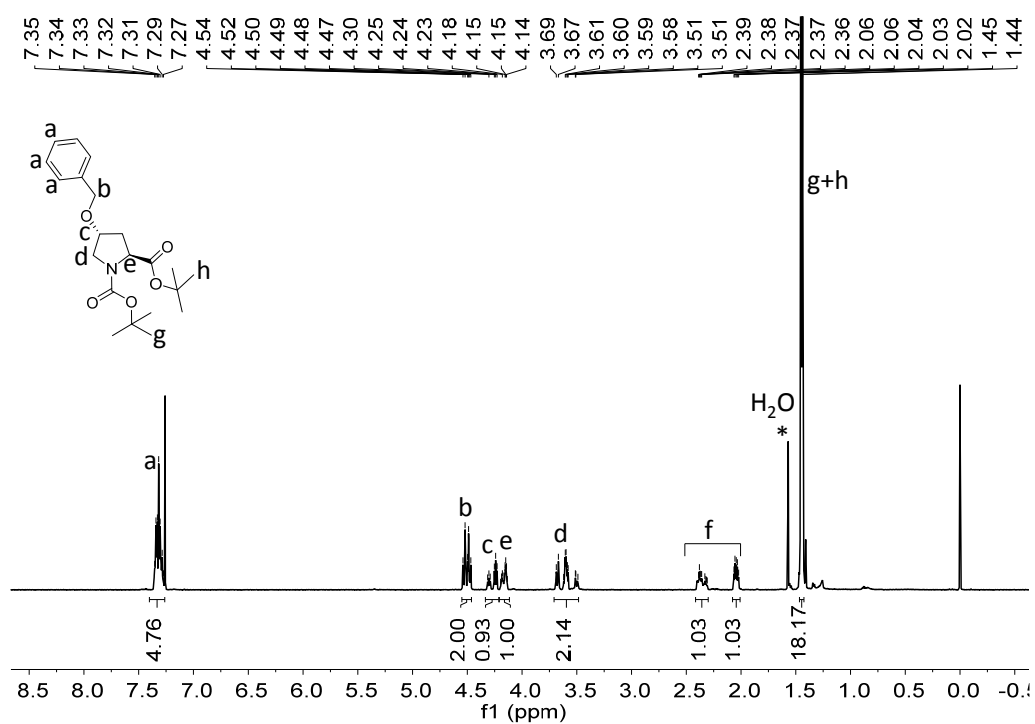

**Figure S6 .** <sup>1</sup>H NMR (600 MHz) spectrum of **3** measured in CDCl<sub>3</sub> at 25 °C.

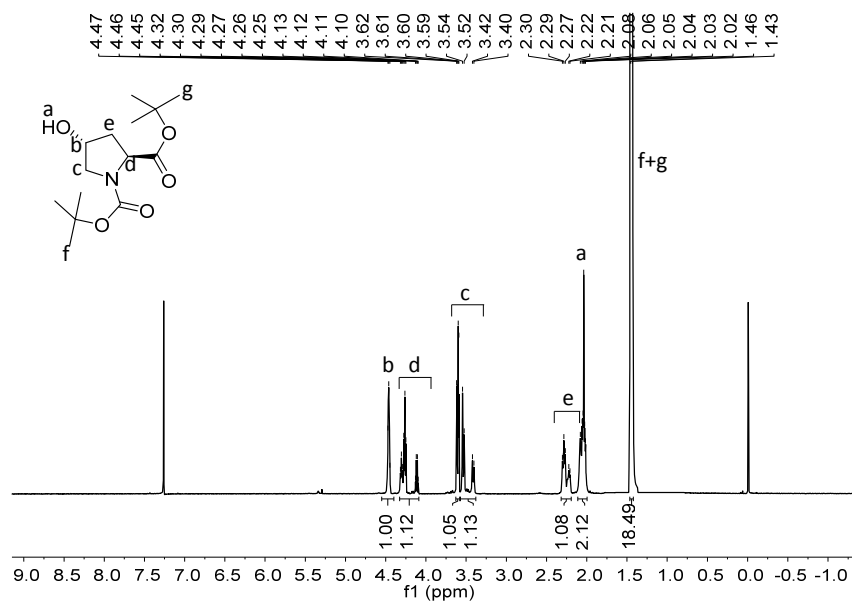

**Figure S7** . <sup>1</sup>H NMR(600 MHz) spectrum of **4** measured in CDCl<sub>3</sub> at 25 °C.

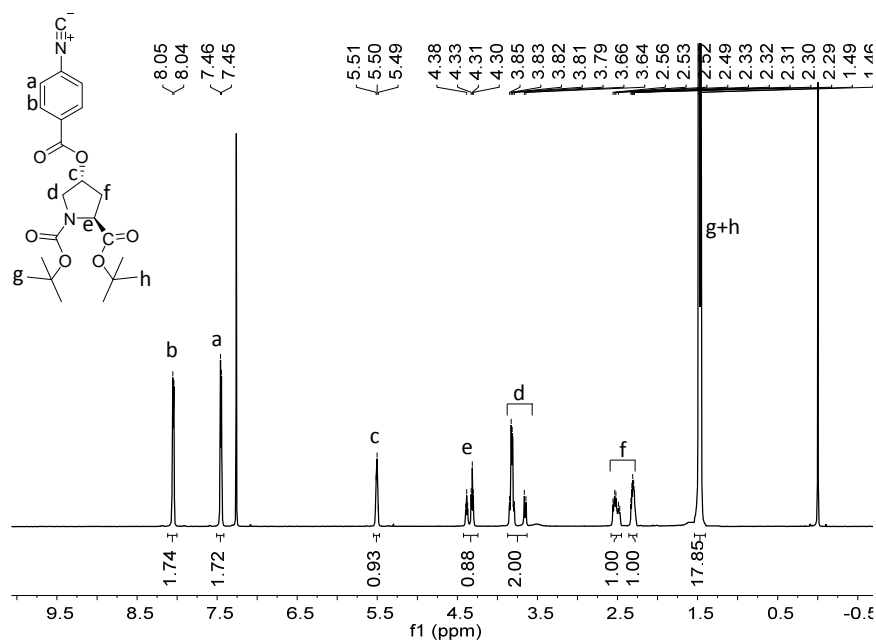

**Figure S8** . <sup>1</sup>H NMR (600 MHz) spectrum of monomer **1** measured in CDCl<sub>3</sub> at 25 °C.

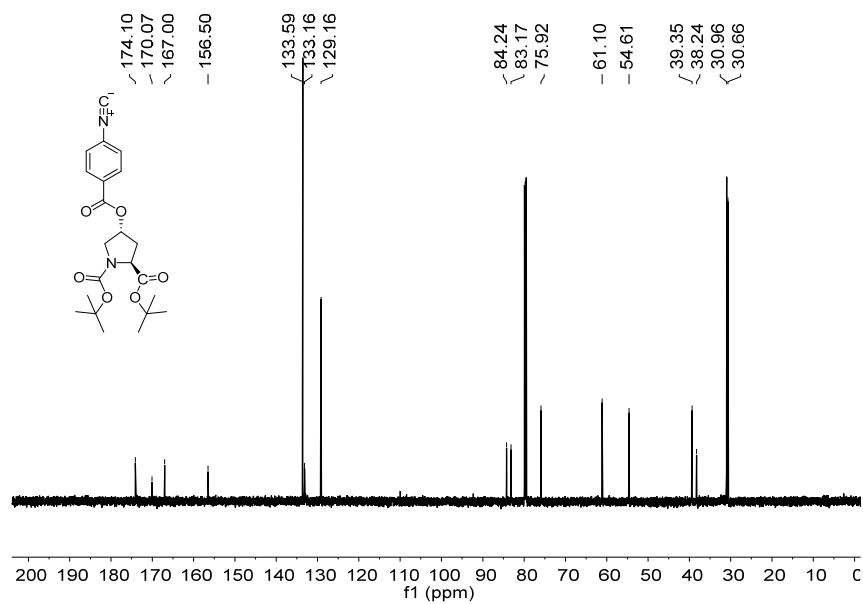

**Figure S9** . <sup>13</sup>C NMR (150 MHz) spectrum of monomer **1** measured in CDCl<sub>3</sub> at 25 °C.

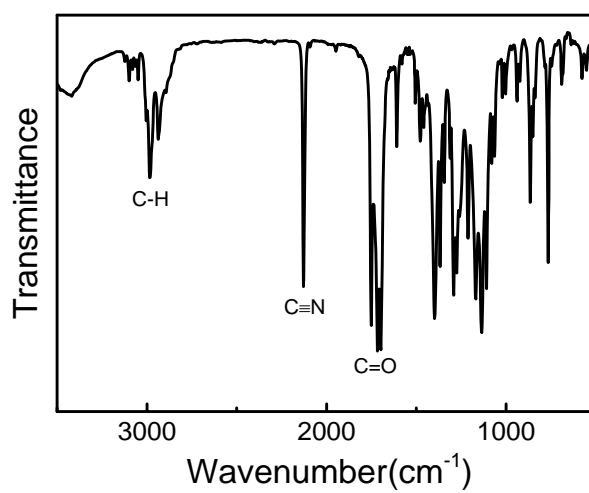

**Figure S10** . FT-IR spectrum of monomer **1** measured at 25 °C using KBr pellets.



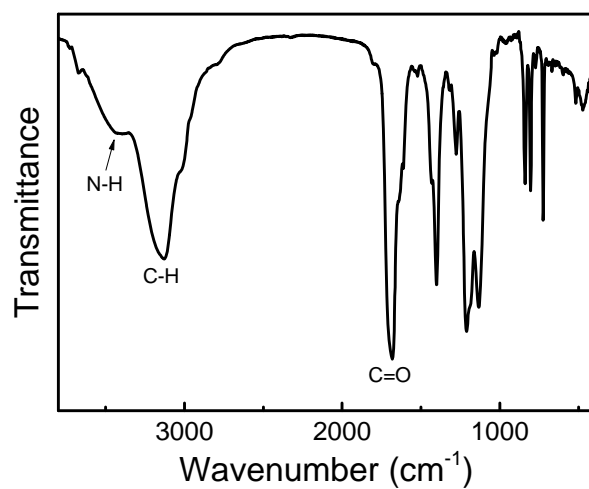

**Figure S13.** FT-IR spectrum of **1-A** measured at 25 °C using KBr pellets.

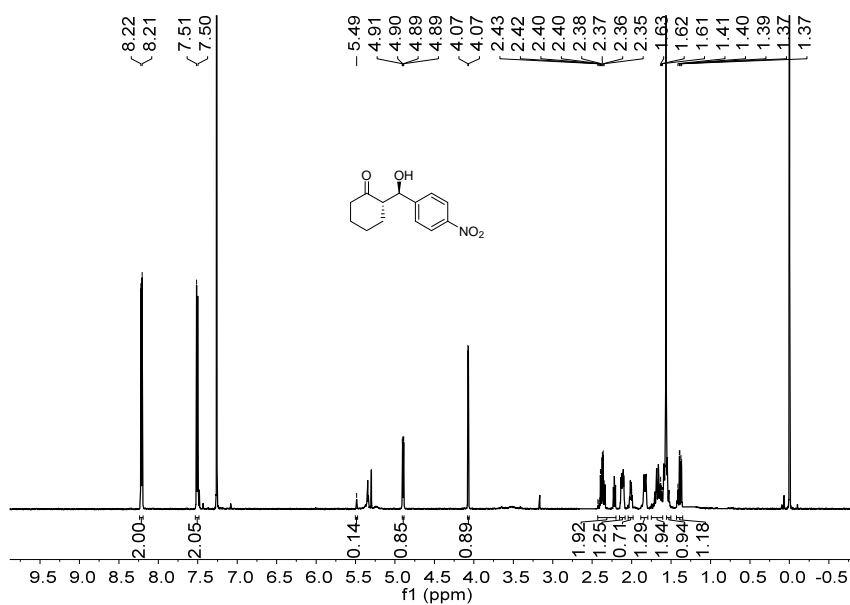

**Figure S14.**  $^1\text{H}$  NMR (600 MHz) spectrum of (2S,1'R)-2-(hydroxyl-(*p*-nitrophenyl)methyl)cyclohexan-1-one measured in  $\text{CDCl}_3$  at 25 °C.

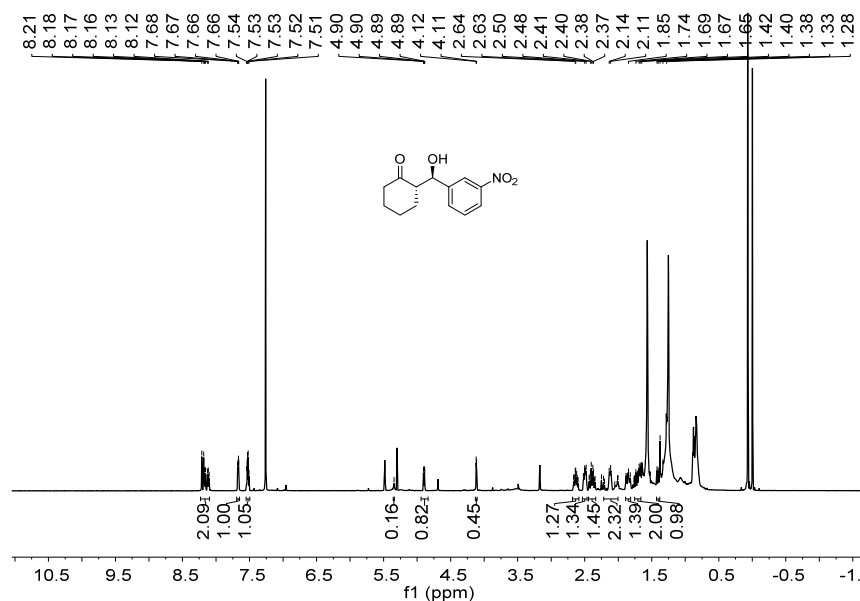

**Figure S15.**  $^1\text{H}$  NMR (600 MHz) spectrum of (2S,1'R)-2-(hydroxyl-(*m*-nitrophenyl)methyl) cyclohexan-1-one measured in  $\text{CDCl}_3$  at 25 °C.

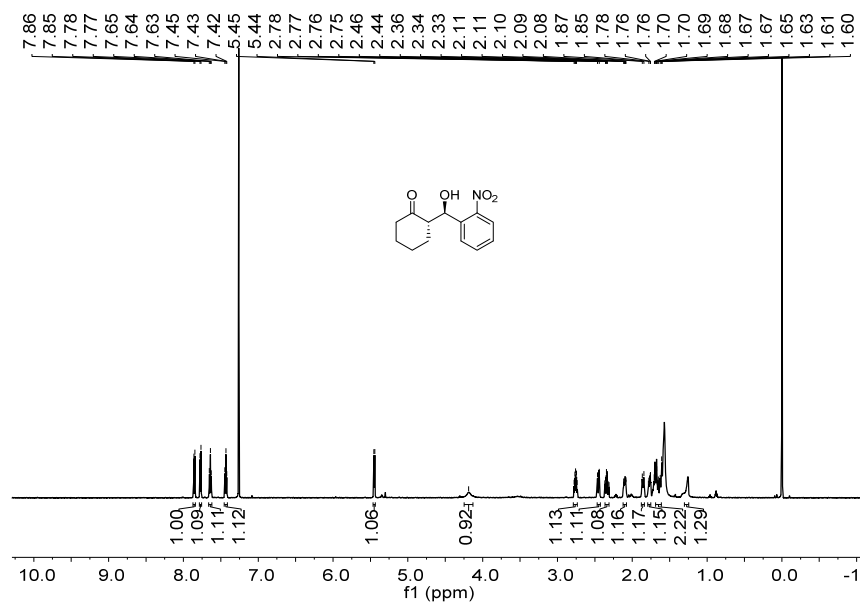

**Figure S16.**  $^1\text{H}$  NMR (600 MHz) spectrum of (2S,1'R)-2-(hydroxyl-(*o*-nitrophenyl)methyl) cyclohexan-1-one measured in  $\text{CDCl}_3$  at 25 °C.

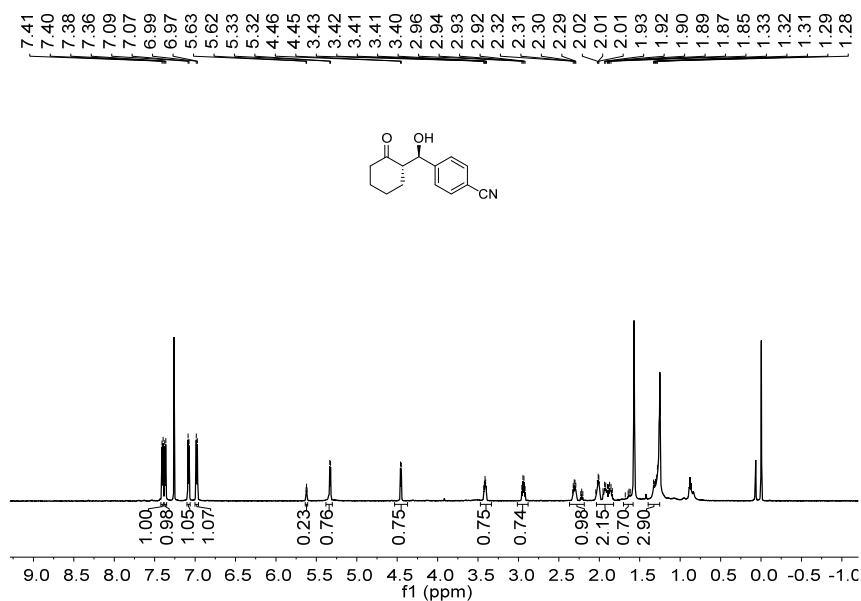

**Figure S17.** <sup>1</sup>H NMR (600 MHz) spectrum of (2S,1'R)-2-(hydroxyl-(p-cyanophenyl)methyl) cyclohexan-1-one measured in CDCl<sub>3</sub> at 25 °C.

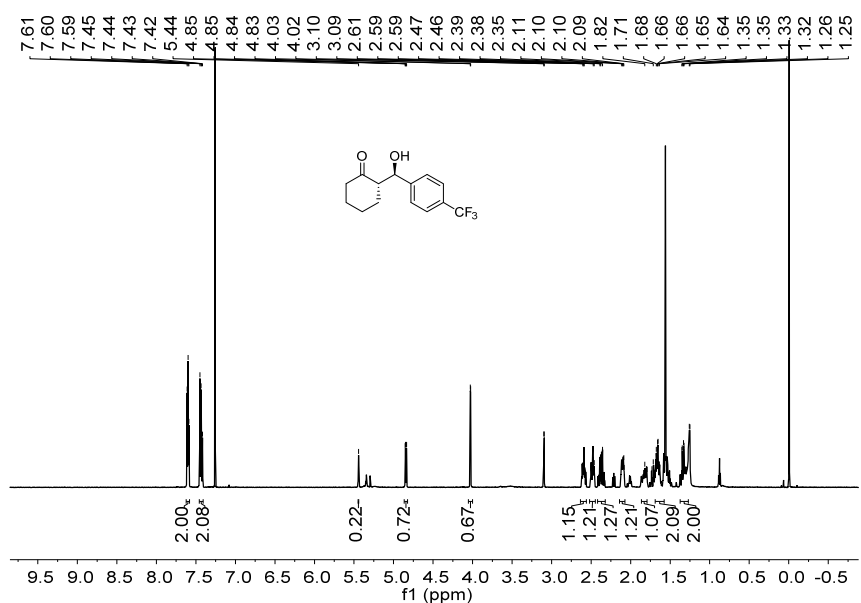

**Figure S18.** <sup>1</sup>H NMR (600 MHz) spectrum of (2S,1'R)-2-(hydroxyl-(p-trifluoromethylphenyl)methyl) cyclohexan-1-one measured in CDCl<sub>3</sub> at 25 °C.

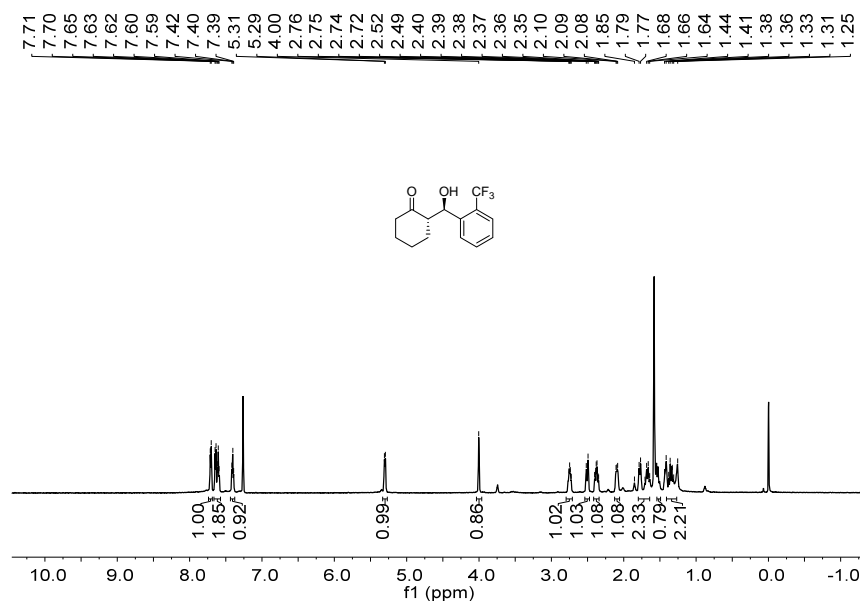

**Figure S19.** <sup>1</sup>H NMR (600 MHz) spectrum of (2S,1'R)-2-(hydroxyl-(*o*-trifluoromethylphenyl)methyl) cyclohexan-1-one measured in CDCl<sub>3</sub> at 25 °C.

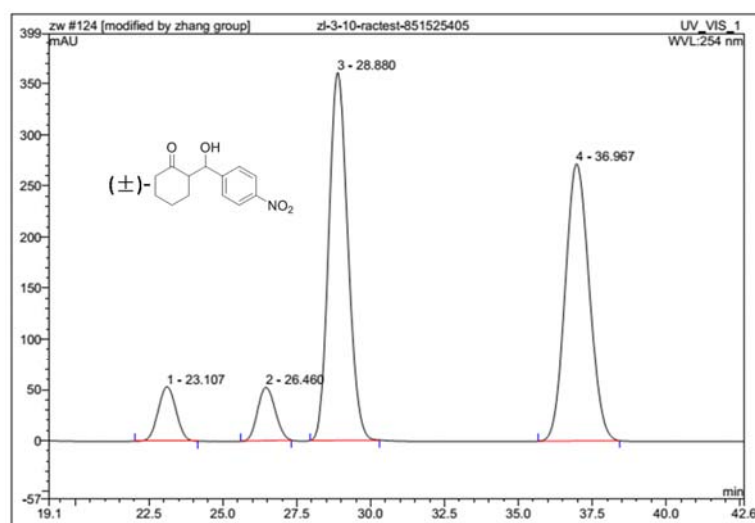

| No.    | Ret.Time<br>min | Peak Name | Height<br>mAU | Area<br>mAU*min | Rel.Area<br>% | Amount | Type |
|--------|-----------------|-----------|---------------|-----------------|---------------|--------|------|
| 1      | 23.11           | n.a.      | 53.326        | 37.468          | 6.26          | n.a.   | BMB* |
| 2      | 26.46           | n.a.      | 52.270        | 36.035          | 6.02          | n.a.   | BMB* |
| 3      | 28.88           | n.a.      | 360.898       | 268.796         | 44.94         | n.a.   | BMB* |
| 4      | 36.97           | n.a.      | 272.066       | 255.869         | 42.78         | n.a.   | BMB* |
| Total: |                 |           | 738.561       | 598.168         | 100.00        | 0.000  |      |

**Figure S20.** HPLC curve of racemic 2-(hydroxyl-(*p*-nitrophenyl)methyl) cyclohexan-1-one (Chiralpak AD-H; *n*-hexane/*i*-PrOH = 85/15 (v/v); 0.5 mL min<sup>-1</sup>; 254 nm; 25 °C).



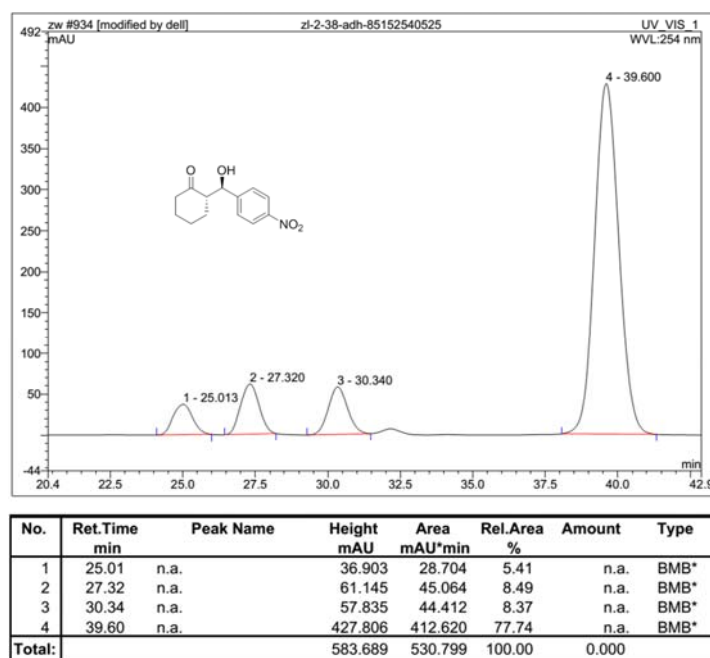

**Figure S21.** HPLC curve of (2S,1'R)-2-(hydroxyl-(*p*-nitrophenyl)methyl) cyclohexan-1-one (Chiralpak AD-H; *n*-hexane/*i*-PrOH = 85/15 (v/v); 0.5 mL min<sup>-1</sup>; 254 nm; 25 °C).

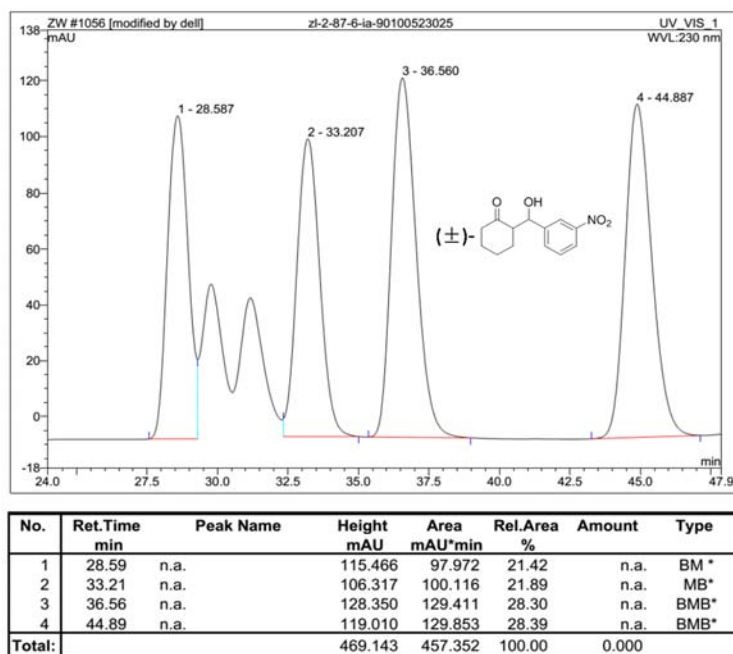

**Figure S22.** HPLC curve of racemic 2-(hydroxyl-(*m*-nitrophenyl)methyl) cyclohexan-1-one (Chiralpak IA; *n*-hexane/*i*-PrOH = 90/10 (v/v); 0.5 mL min<sup>-1</sup>; 230 nm; 25 °C).

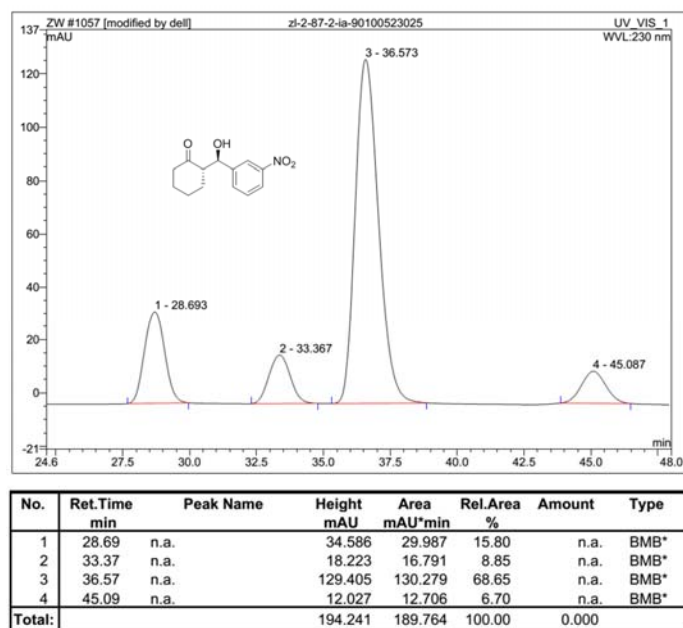

**Figure S23.** HPLC curve of (2S,1'R)-2-(hydroxyl-(*m*-nitrophenyl)methyl) cyclohexan-1-one (Chiralpak IA; *n*-hexane/*i*-PrOH = 90/10 (v/v); 0.5 mL min<sup>-1</sup>; 230 nm; 25 °C).

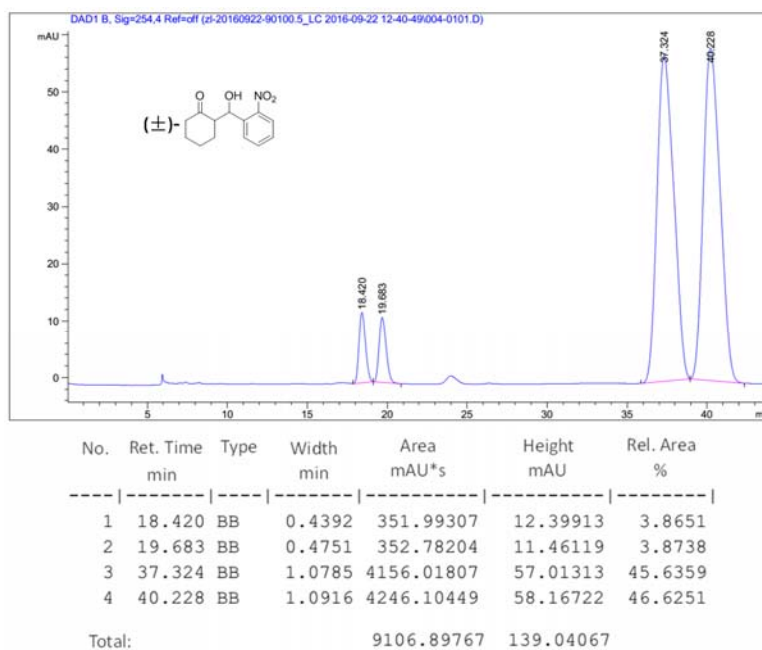

**Figure S24.** HPLC curve of racemic 2-(hydroxyl-(*o*-nitrophenyl)methyl) cyclohexan-1-one (Chiralpak AD-H; *n*-hexane/*i*-PrOH = 90/10 (v/v); 0.5 mL min<sup>-1</sup>; 254 nm; 25 °C).

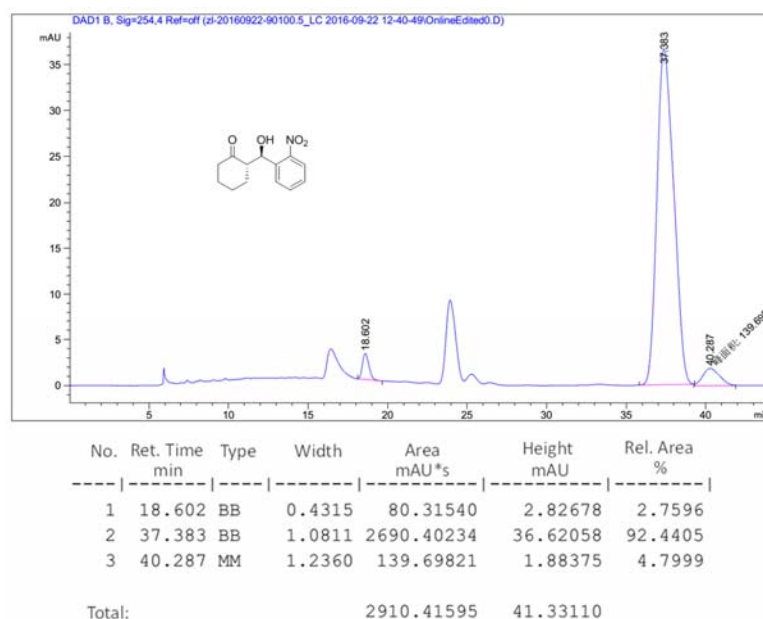

**Figure S25.** HPLC curve of (2S,1'R)-2-(hydroxyl-(*o*-nitrophenyl)methyl) cyclohexan-1-one (Chiralpak AD-H; *n*-hexane/*i*-PrOH = 90/10 (v/v); 0.5 mL min<sup>-1</sup>; 254 nm; 25 °C).

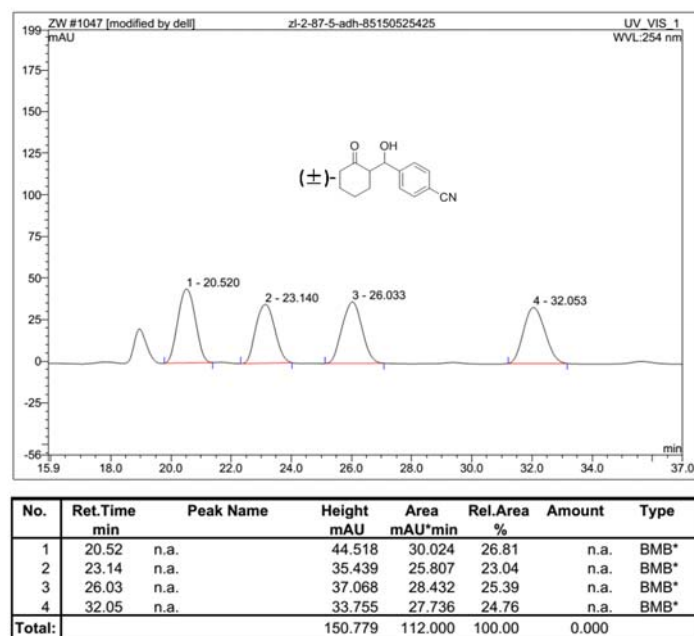

**Figure S26.** HPLC curve of racemic 2-(hydroxyl-(*p*-cyanophenyl)methyl) cyclohexan-1-one (Chiralpak AD-H; *n*-hexane/*i*-PrOH = 85/15 (v/v); 0.5 mL min<sup>-1</sup>; 230 nm; 25 °C).

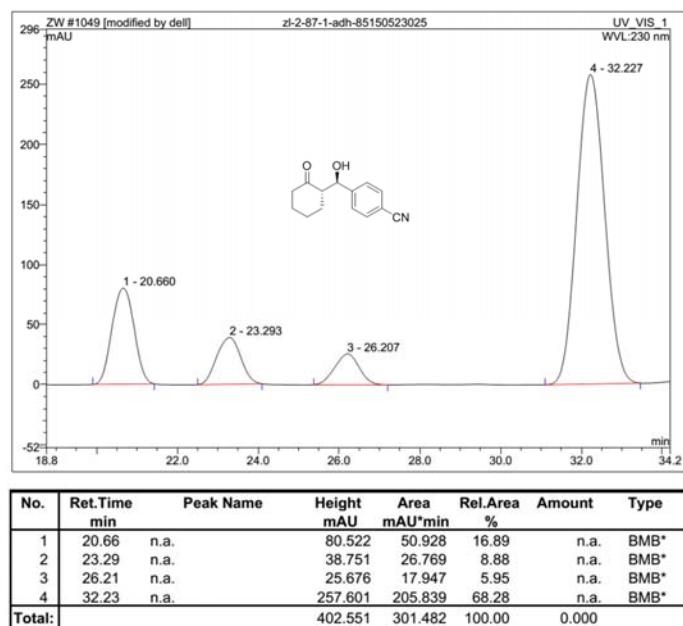

**Figure S27.** HPLC curve of (2S,1'R)-2-(hydroxyl-(*p*-cyanophenyl)methyl) cyclohexan-1-one (Chiralpak AD-H; *n*-hexane/*i*-PrOH = 85/15 (v/v); 0.5 mL min<sup>-1</sup>; 230 nm; 25 °C).

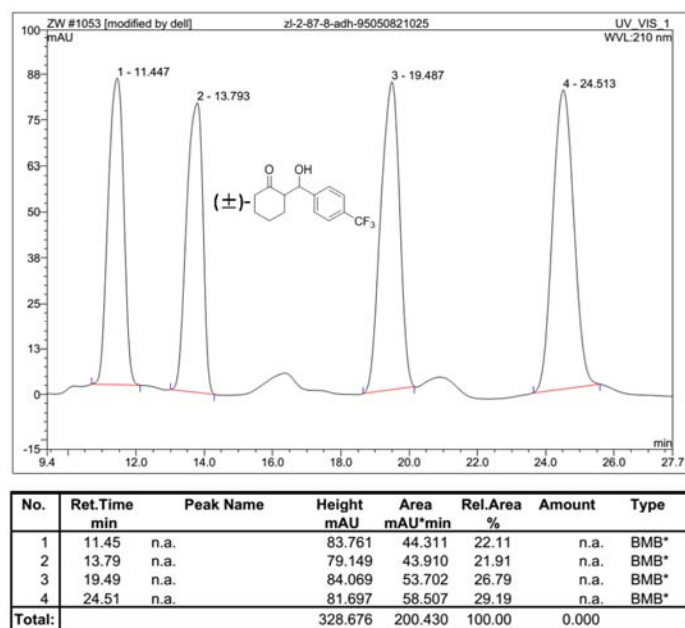

**Figure S28.** HPLC curve of racemic 2-(hydroxyl-(*p*-trifluoromethylphenyl)methyl) cyclohexan-1-one (Chiralpak AD-H; *n*-hexane/*i*-PrOH = 95/5 (v/v); 0.8 mL min<sup>-1</sup>; 210 nm; 25 °C).

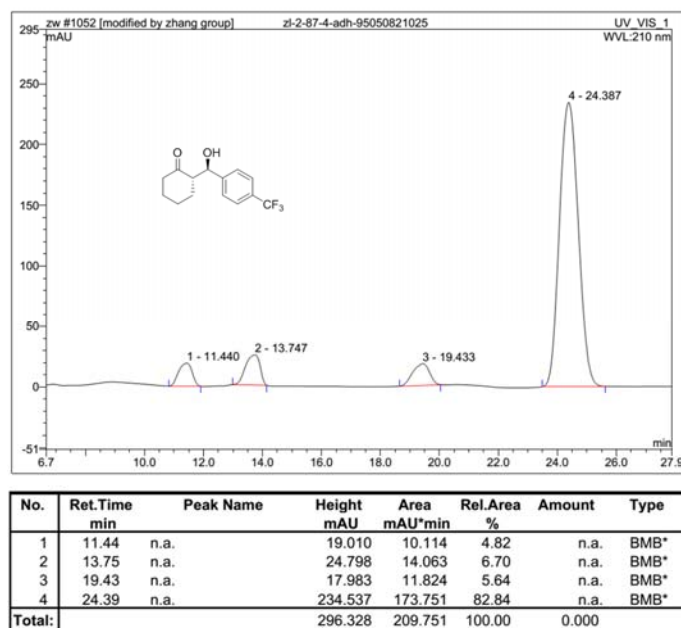

**Figure S29.** HPLC curve of (2S,1'R)-2-(hydroxyl-(*p*-trifluoromethylphenyl)methyl)cyclohexan-1-one (Chiralpak AD-H, *n*-hexane/*i*-PrOH = 95/5 (v/v); 0.8 mL min<sup>-1</sup>; 210 nm; 25 °C).

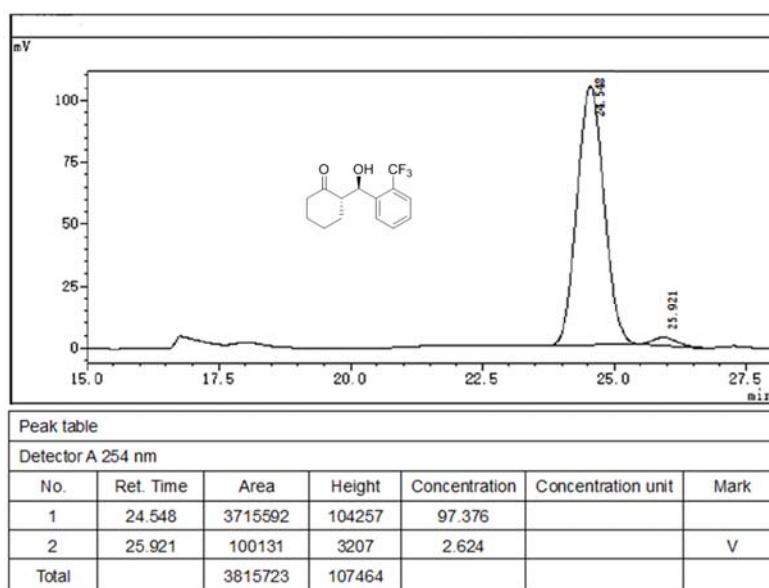

**Figure S30.** HPLC curve of racemic 2-(hydroxyl-(*o*-trifluoromethylphenyl)methyl)cyclohexan-1-one (Chiralpak AD-H; *n*-hexane/*i*-PrOH = 90/10 (v/v); 0.5 mL min<sup>-1</sup>; 254 nm; 25 °C).

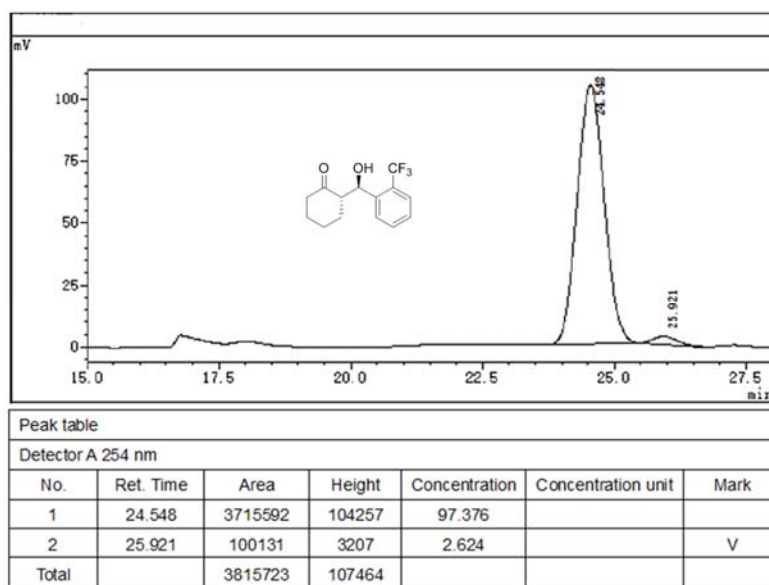

**Figure S32.** HPLC curve of (2S,1'R)-2-(hydroxyl-(*o*-trifluoromethylphenyl)methyl)cyclohexan-1-one (Chiralpak AD-H; *n*-hexane/*i*-PrOH = 90/10 (v/v); 0.5 mL min<sup>-1</sup>; 254 nm; 25 °C).
